# Supplementary material for: Synthesis and photophysical, electrochemical, antibacterial, and DNA binding studies of triazinocalix[2]arenes
Source: Royal Society of Chemistry journal article supplement (doi:10.1039/c4tb01848f), 2015-01-01
Supplement: c4tb01848f1.pdf [file c4tb01848f1.pdf]

# Synthesis and photophysical, electrochemical, antibacterial, DNA binding studies of Triazinocalix[2]arenes

Kannan Rajavelu and Perumal Rajakumar\*

*Department of Organic Chemistry, University of Madras, Guindy campus, Chennai- 600 025,  
Tamil nadu, INDIA*

Tel No: +91 44 2220 2810

E-mail: [perumalrajakumar@gmail.com](mailto:perumalrajakumar@gmail.com)

## Supporting Information

### Content

|                                                                    |     |
|--------------------------------------------------------------------|-----|
| Abbreviations.....                                                 | S-1 |
| Spectroscopic data.....                                            | S-2 |
| Absorption and Emission spectrum of oxacalixarene <b>2-9</b> ..... | S-3 |
| DNA binding studies of oxacalixarene <b>5</b> .....                | S-4 |
| Antibacterial studies of oxacalixarene <b>2-9</b> .....            | S-5 |
| Docking studies of oxacalixarene <b>2</b> and <b>4</b> .....       | S-6 |

**S-1**  
**Abbreviations**

|                   |   |                                     |
|-------------------|---|-------------------------------------|
| DIPEA             | : | Diisopropyl ethylamine              |
| THF               | : | Tetrahydrofuran                     |
| CHCl <sub>3</sub> | : | Chloroform                          |
| UV                | : | Ultraviolet                         |
| CV                | : | Cyclic Voltammetry                  |
| CD                | : | Circular Dichroism                  |
| AgNO <sub>3</sub> | : | Silver nitrate                      |
| TBAP              | : | Tetrabutylammonium Perchlorate      |
| CT-DNA            | : | Calf thymus - Deoxyribonucleic acid |
| Tris-HCl          | : | Tris(hydroxymethyl)aminomethane-HCl |
| ESI-Mass          | : | Electrospray ionization             |
| NMR               | : | Nuclear Magnetic Resonance          |

S-2

## Spectroscopic data

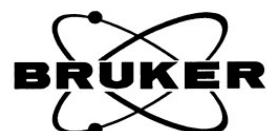

Current Data Parameters  
NAME KR-111B  
EXPNO 1  
PROCNO 1

F2 - Acquisition Parameters  
Date\_ 20131128  
Time\_ 13.51  
INSTRUM spect  
PROBHD 5 mm DUL 13C-1  
PULPROG zg30  
TD 65536  
SOLVENT CDCl3  
NS 16  
DS 2  
SWH 6172.839 Hz  
FIDRES 0.094190 Hz  
AQ 5.3084660 sec  
RG 161.3  
DW 81.000 usec  
DE 6.00 usec  
TE 300.0 K  
D1 1.00000000 sec  
TD0 1

=====  
CHANNEL f1  
NUC1 1H  
P1 13.15 usec  
PL1 0.00 dB  
SFO1 300.1318534 MHz

F2 - Processing parameters  
SI 32768  
SF 300.1299984 MHz  
WDW EM  
SSB 0  
LB 0.30 Hz  
GB 0  
PC 1.00

7.845  
7.820  
7.794  
7.479  
7.453  
7.287  
5.632

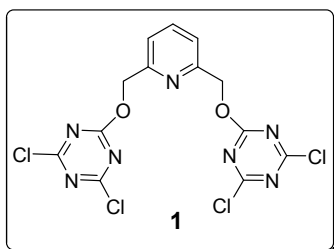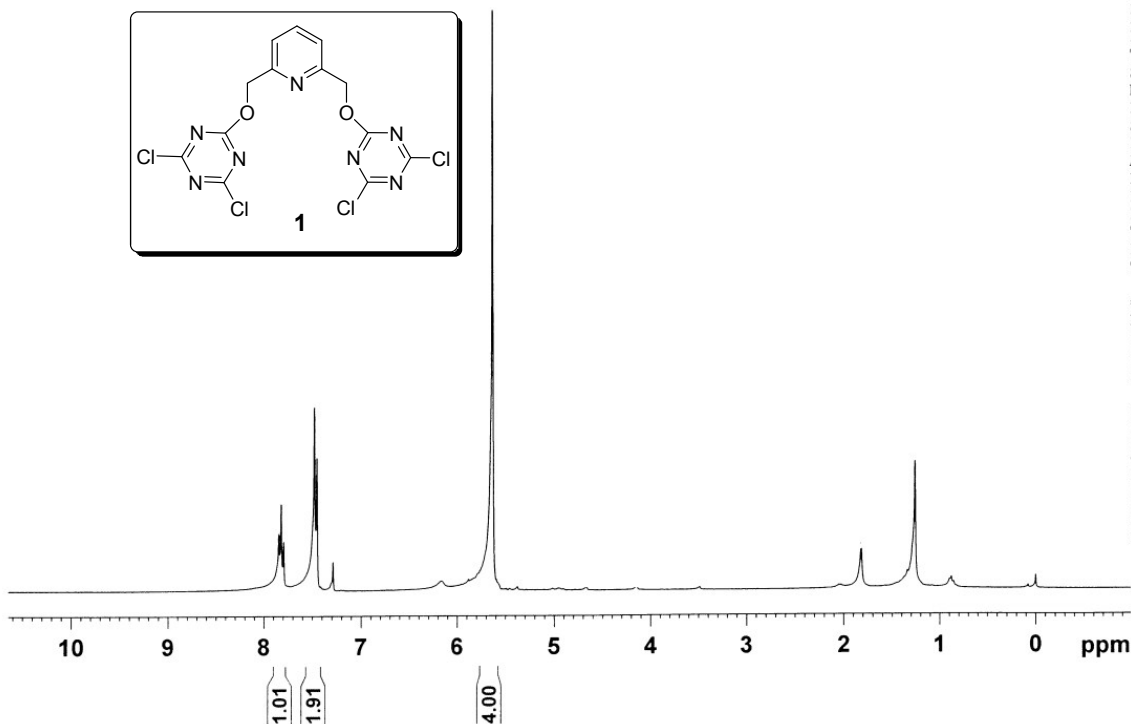

$^1\text{H}$  NMR (300 MHz,  $\text{CDCl}_3$ ) spectrum of the Precyclophane **1**

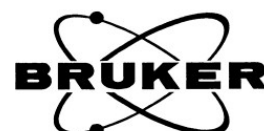

Current Data Parameters  
NAME KR-111B  
EXPNO 2  
PROCNO 1

F2 - Acquisition Parameters  
Date\_ 20131128  
Time\_ 13.56  
INSTRUM spect  
PROBHD 5 mm DUL 13C-1  
PULPROG zgpg30  
TD 65536  
SOLVENT CDC13  
NS 173  
DS 4  
SWH 17985.611 Hz  
FIDRES 0.274439 Hz  
AQ 1.8219508 sec  
RG 1625.5  
DW 27.800 usec  
DE 6.00 usec  
TE 300.0 K  
D1 2.00000000 sec  
d11 0.03000000 sec  
DELTA 1.89999998 sec  
TD0 1

===== CHANNEL f1 =====  
NUC1 13C  
P1 9.30 usec  
PL1 0.00 dB  
SFO1 75.4752953 MHz

===== CHANNEL f2 =====  
CPDPRG2 waltz16  
NUC2 1H  
PCPD2 80.00 usec  
PL2 0.00 dB  
PL12 15.68 dB  
PL13 16.00 dB  
SFO2 300.1312005 MHz

F2 - Processing parameters  
SI 32768  
SF 75.4677490 MHz  
WDW EM  
SSB 0  
LB 1.00 Hz  
GB 0  
PC 1.40

172.75  
170.87  
153.96  
137.96  
121.35

77.47  
77.05  
76.62  
71.26

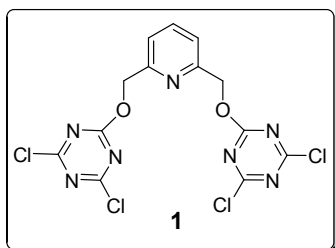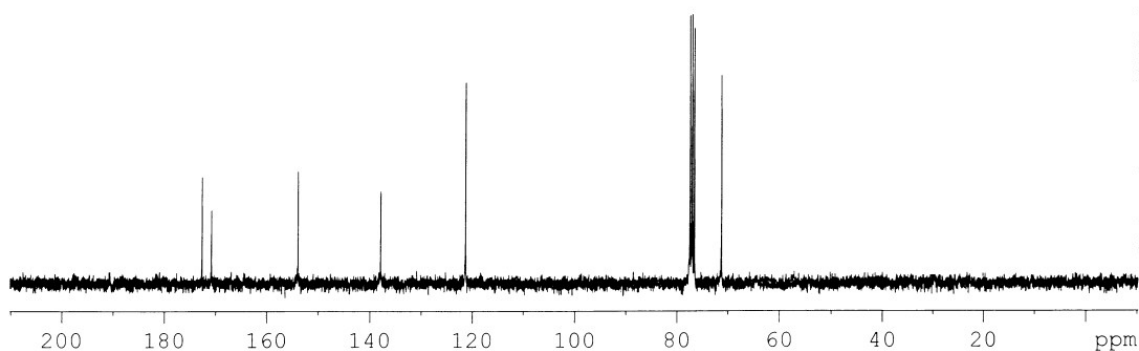

$^{13}\text{C}$  NMR (75 MHz,  $\text{CDCl}_3$ ) spectrum of the Precyclophane 1

UNIV. OF MADRAS

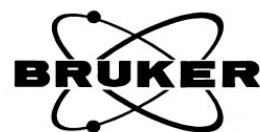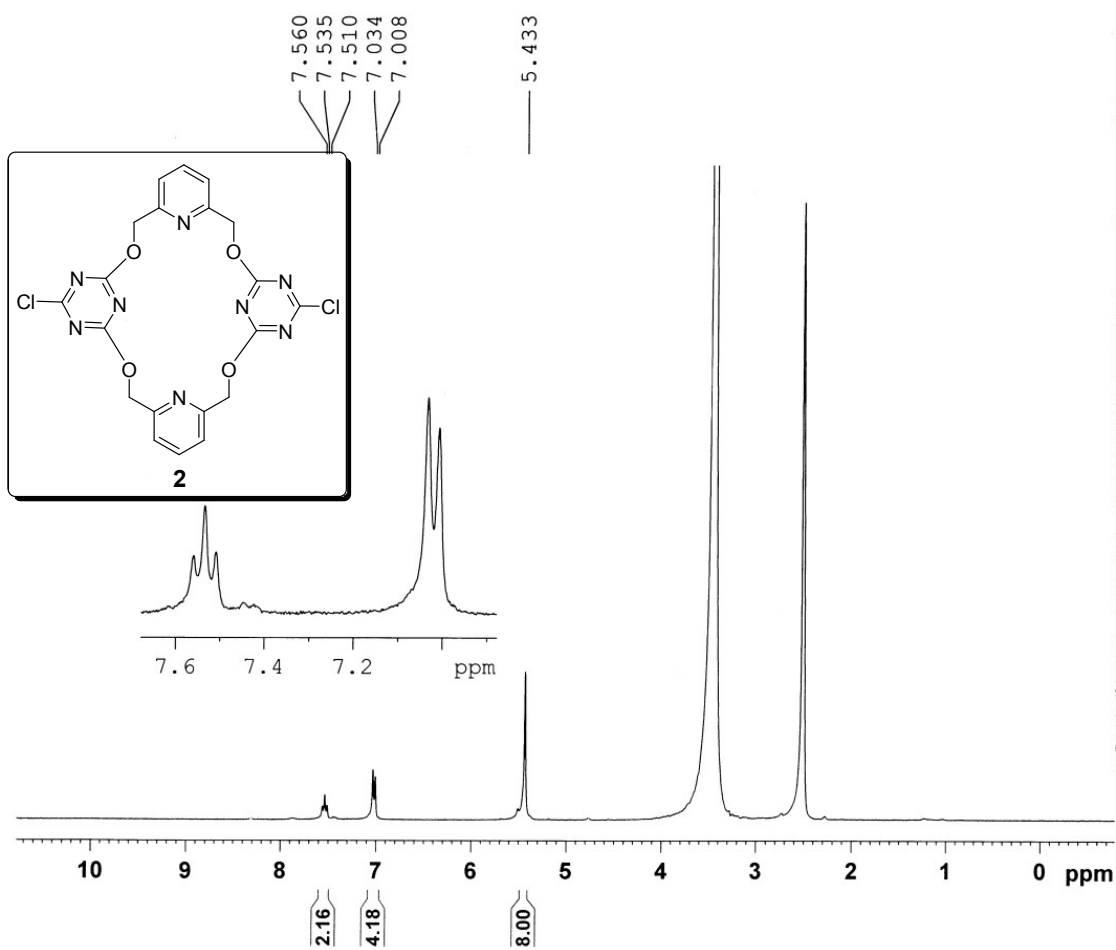

Current Data Parameters  
NAME KRC-232-II  
EXPNO 6  
PROCNO 1

F2 - Acquisition Parameters  
Date\_ 20150121  
Time 14.56  
INSTRUM spect  
PROBHD 5 mm DUL 13C-1  
PULPROG zg30  
TD 65536  
SOLVENT DMSO  
NS 16  
DS 2  
SWH 6172.839 Hz  
FIDRES 0.094190 Hz  
AQ 5.3084660 sec  
RG 101.6  
DW 81.000 usec  
DE 6.00 usec  
TE 300.0 K  
D1 1.00000000 sec  
TD0 1

===== CHANNEL f1 =====  
NUC1 1H  
P1 13.15 usec  
PL1 0.00 dB  
SF01 300.1318534 MHz

F2 - Processing parameters  
SI 32768  
SF 300.1300000 MHz  
WDW EM  
SSB 0  
LB 0.30 Hz  
GB 0  
PC 1.00

<sup>1</sup>H NMR (300 MHz, DMSO-d<sub>6</sub>) spectrum of the Oxacalixarene 2

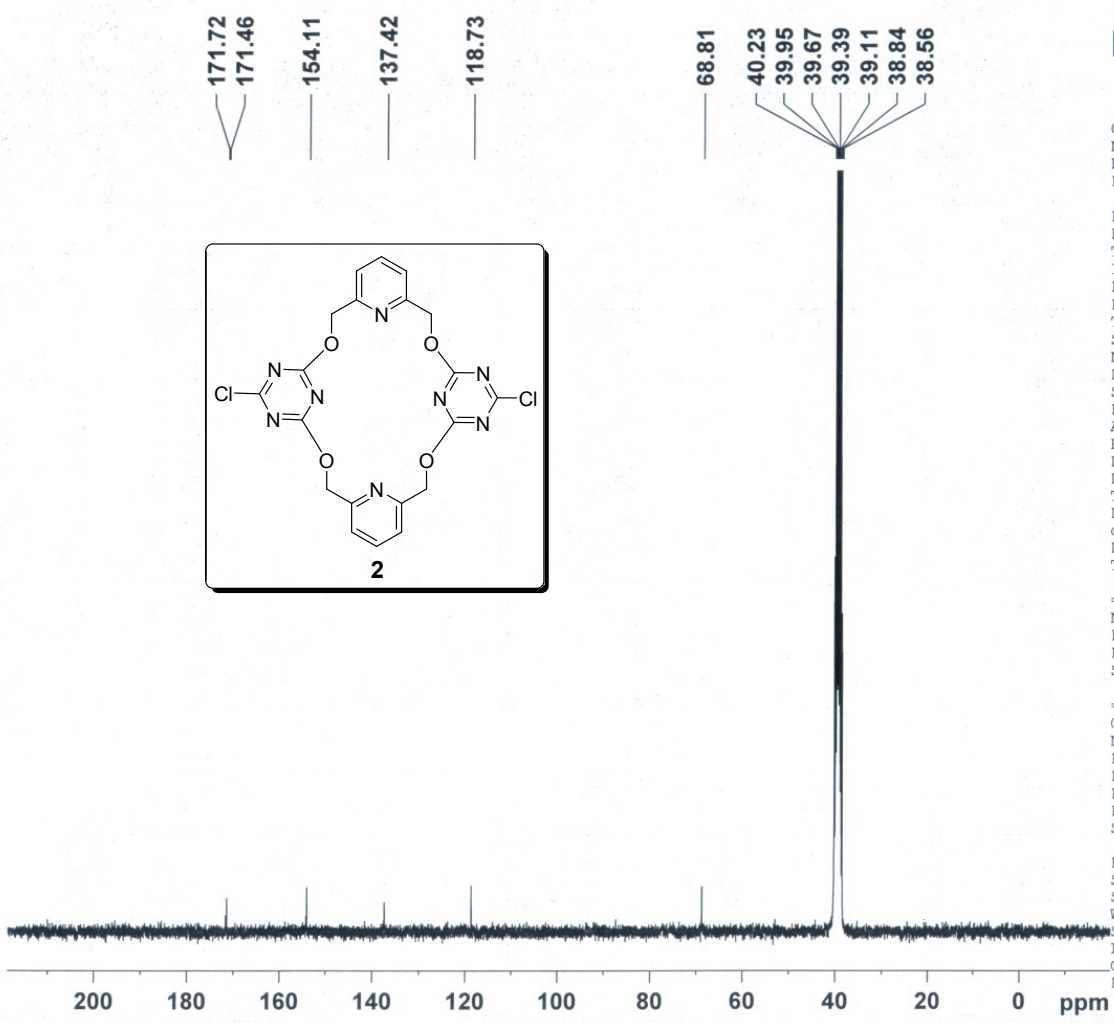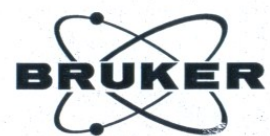

Current Data Parameters  
 NAME KRC-232-II  
 EXPNO 1  
 PROCNO 1

F2 - Acquisition Parameters  
 Date 20150124  
 Time 14.03  
 INSTRUM spect  
 PROBHD 5 mm DUL 13C-1  
 PULPROG zgpg30  
 TD 65536  
 SOLVENT DMSO  
 NS 2000  
 DS 4  
 SWH 17985.611 Hz  
 FIDRES 0.274439 Hz  
 AQ 1.8219508 sec  
 RG 2896.3  
 DW 27.800 usec  
 DE 6.00 usec  
 TE 300.0 K  
 D1 2.00000000 sec  
 d11 0.03000000 sec  
 DELTA 1.89999998 sec  
 TD0 1

==== CHANNEL f1 =====  
 NUC1 13C  
 P1 9.30 usec  
 PL1 0.00 dB  
 SFO1 75.4752953 MHz

==== CHANNEL f2 =====  
 CPDPRG2 waltz16  
 NUC2 1H  
 PCPD2 80.00 usec  
 PL2 0.00 dB  
 PL12 15.68 dB  
 PL13 16.00 dB  
 SFO2 300.1312005 MHz

F2 - Processing parameters  
 SI 32768  
 SF 75.4677867 MHz  
 WDW EM  
 SSB 0  
 LB 1.00 Hz  
 GB 0  
 PC 1.40

<sup>13</sup>C NMR (75 MHz, DMSO-d<sub>6</sub>) spectrum of the Oxcalixarene 2

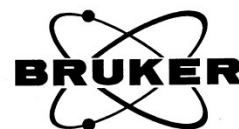

Current Data Parameters  
NAME KR-97  
EXPNO 1  
PROCNO 1

F2 - Acquisition Parameters  
Date\_ 20131023  
Time\_ 1.10  
INSTRUM spect  
PROBHD 5 mm DUL 13C-1  
PULPROG zg30  
TD 65536  
SOLVENT CDCl3  
NS 16  
DS 2  
SWH 6172.839 Hz  
FIDRES 0.094190 Hz  
AQ 5.3084660 sec  
RG 228.1  
DW 81.000 usec  
DE 6.00 usec  
TE 300.0 K  
D1 1.00000000 sec  
TDO 1

===== CHANNEL f1 =====  
NUC1 1H  
P1 13.15 usec  
PL1 0.00 dB  
SFO1 300.1318534 MHz

F2 - Processing parameters  
SI 32768  
SF 300.1300246 MHz  
WDW EM  
SSB 0  
LB 0.30 Hz  
GB 0  
PC 1.00

7.482  
7.455  
7.429  
7.404  
7.202  
7.011  
6.983  
6.901  
6.875  
6.527  
5.252

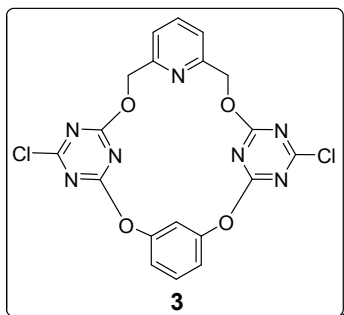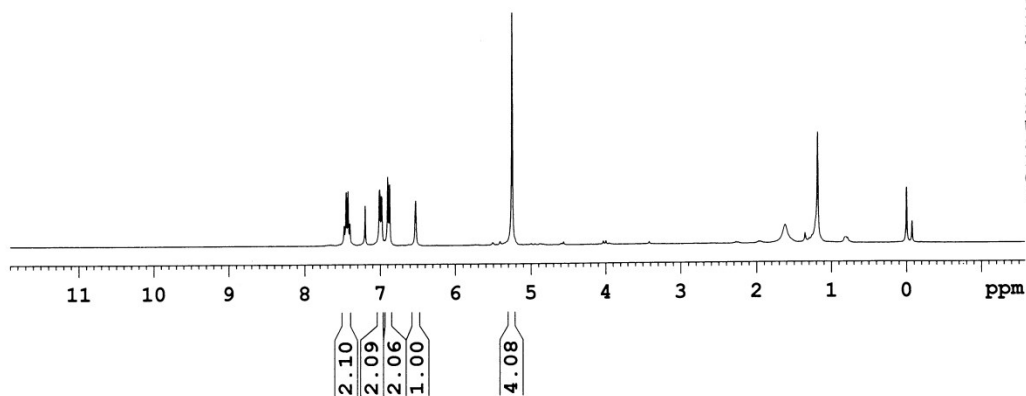

$^1\text{H}$  NMR (300 MHz,  $\text{CDCl}_3$ ) spectrum of the Oxacalixarene **3**

174.12  
172.11  
171.91

155.10  
151.74

137.67  
129.91  
120.37  
117.48  
113.82

77.45  
77.03  
76.60  
70.27

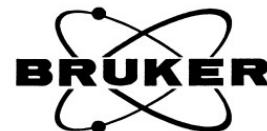

Current Data Parameters  
NAME KR-97  
EXPNO 2  
PROCNO 1

F2 - Acquisition Parameters  
Date\_ 20131023  
Time\_ 1.13  
INSTRUM spect  
PROBHD 5 mm DUL 13C-1  
PULPROG zgpg30  
TD 65536  
SOLVENT CDCl3  
NS 90  
DS 4  
SWH 17985.611 Hz  
FIDRES 0.274439 Hz  
AQ 1.8219508 sec  
RG 1290.2  
DW 27.800 usec  
DE 6.00 usec  
TE 300.0 K  
D1 2.00000000 sec  
d11 0.03000000 sec  
DELTA 1.89999998 sec  
TDO 1

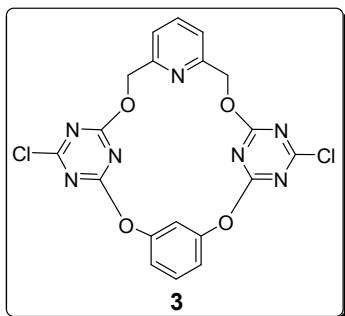

==== CHANNEL f1 =====  
NUC1 13C  
P1 9.30 usec  
PL1 0.00 dB  
SFO1 75.4752953 MHz

==== CHANNEL f2 =====  
CPDPRG2 waltz16  
NUC2 1H  
PCPD2 80.00 usec  
PL2 0.00 dB  
PL12 15.68 dB  
PL13 16.00 dB  
SFO2 300.1312005 MHz

F2 - Processing parameters  
SI 32768  
SF 75.4677490 MHz  
WDW EM  
SSB 0  
LB 1.00 Hz  
GB 0  
PC 1.40

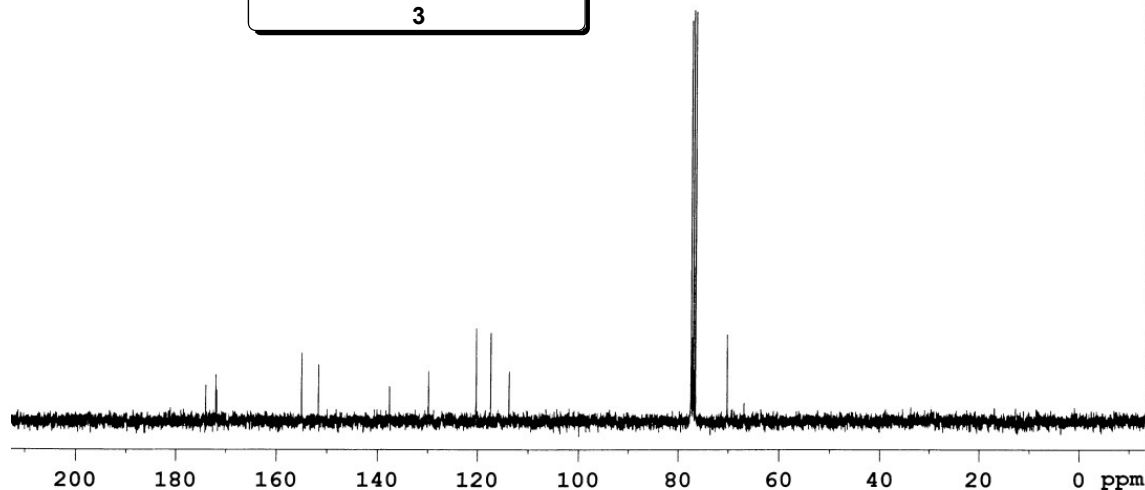

<sup>13</sup>C NMR (75 MHz, CDCl<sub>3</sub>) spectrum of the Oxacalixarene **3**



UNIV OF MADRAS

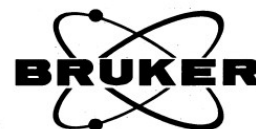

Current Data Parameters  
NAME KR-115  
EXPNO 1  
PROCNO 1

F2 - Acquisition Parameters  
Date\_ 20131206  
Time\_ 19.10  
INSTRUM spect  
PROBHD 5 mm DUL 13C-1  
PULPROG zg30  
TD 65536  
SOLVENT CDC13  
NS 16  
DS 2  
SWH 6172.839 Hz  
FIDRES 0.094190 Hz  
AQ 5.3084660 sec  
RG 128  
DW 81.000 usec  
DE 6.00 usec  
TE 300.0 K  
D1 1.00000000 sec  
TDO 1

===== CHANNEL f1 =====  
NUC1 1H  
P1 13.15 usec  
PL1 0.00 dB  
SFO1 300.1318534 MHz

F2 - Processing parameters  
SI 32768  
SF 300.1300003 MHz  
WDW EM  
SSB 0  
LB 0.30 Hz  
GB 0  
PC 1.00

7.529  
7.503  
7.477  
7.282  
6.970  
6.944  
6.876  
6.403

5.335

2.460

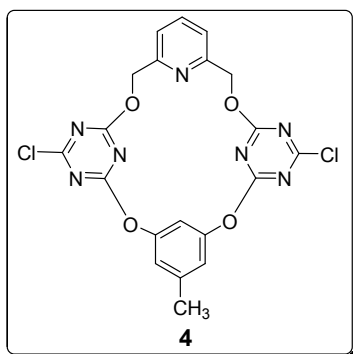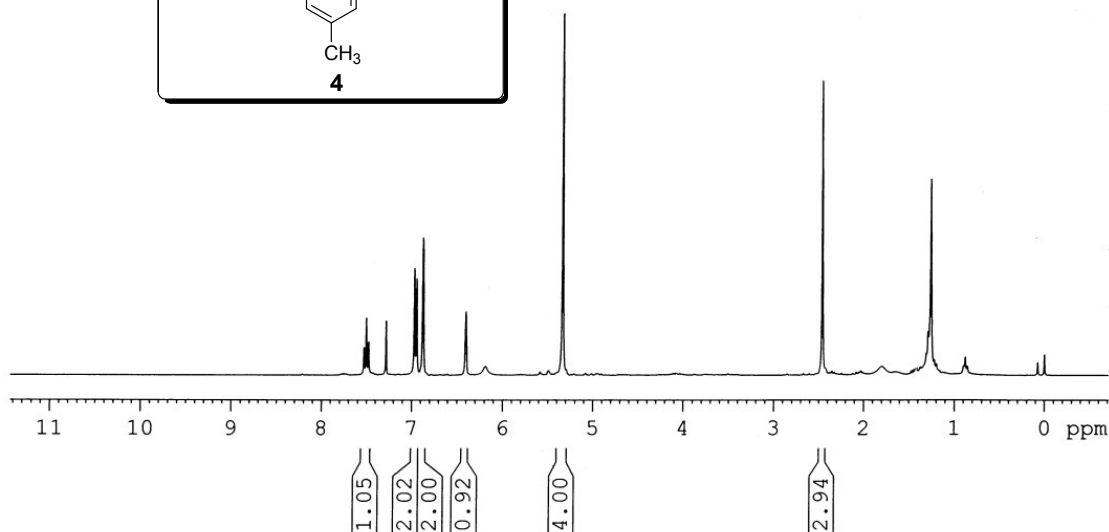

$^1\text{H}$  NMR (300 MHz,  $\text{CDCl}_3$ ) spectrum of the Oxacalixarene 4

UNIV OF MADRAS

174.01  
172.13  
171.92  
155.07  
151.47  
140.74  
137.59  
120.81  
117.45  
110.75

77.46  
77.04  
76.62  
70.29

21.44

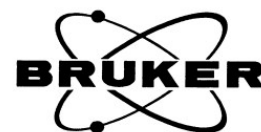

Current Data Parameters  
NAME KR-115  
EXPNO 2  
PROCNO 1

F2 - Acquisition Parameters  
Date\_ 20131206  
Time\_ 19.19  
INSTRUM spect  
PROBHD 5 mm DUL 13C-1  
PULPROG zgpg30  
TD 65536  
SOLVENT CDC13  
NS 133  
DS 4  
SWH 17985.611 Hz  
FIDRES 0.274439 Hz  
AQ 1.8219508 sec  
RG 456.1  
DW 27.800 usec  
DE 6.00 usec  
TE 300.0 K  
D1 2.00000000 sec  
d11 0.03000000 sec  
DELTA 1.89999998 sec  
TDO 1

==== CHANNEL f1 =====  
NUC1 13C  
P1 9.30 usec  
PL1 0.00 dB  
SFO1 75.4752953 MHz

==== CHANNEL f2 =====  
CPDPRG2 waltz16  
NUC2 1H  
PCPD2 80.00 usec  
PL2 0.00 dB  
PL12 15.68 dB  
PL13 16.00 dB  
SFO2 300.1312005 MHz

F2 - Processing parameters  
SI 32768  
SF 75.4677490 MHz  
WDW EM  
SSB 0  
LB 1.00 Hz  
GB 0  
PC 1.40

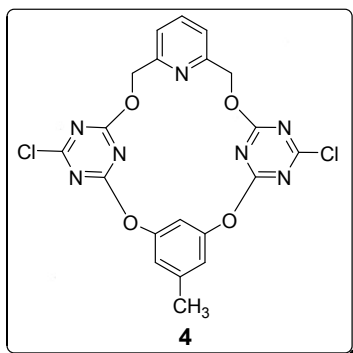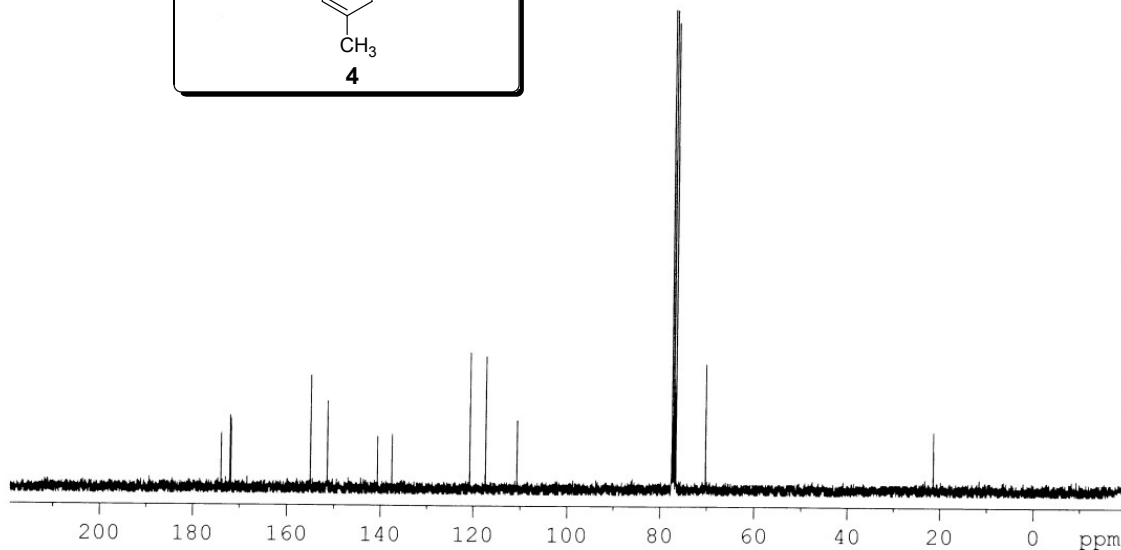

<sup>13</sup>C NMR (75 MHz, CDCl<sub>3</sub>) spectrum of the Oxacalixarene 4

UNIV. OF MADRAS

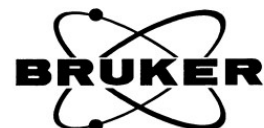

Current Data Parameters  
NAME KR-72  
EXPNO 3  
PROCNO 1

F2 - Acquisition Parameters  
Date\_ 20130808  
Time\_ 14.36  
INSTRUM spect  
PROBHD 5 mm DUL 13C-1  
PULPROG zg30  
TD 65536  
SOLVENT CDC13  
NS 16  
DS 2  
SWH 6172.839 Hz  
FIDRES 0.094190 Hz  
AQ 5.3084660 sec  
RG 287.4  
DW 81.000 usec  
DE 6.00 usec  
TE 300.0 K  
D1 1.00000000 sec  
TD0 1

===== CHANNEL f1 =====  
NUC1 1H  
P1 13.15 usec  
PL1 0.00 dB  
SFO1 300.1318534 MHz

F2 - Processing parameters  
SI 32768  
SF 300.1300033 MHz  
WDW EM  
SSB 0  
LB 0.30 Hz  
GB 0  
PC 1.00

7.750  
7.522  
7.496  
7.470  
6.964  
6.938  
6.805  
  
5.309  
  
3.985

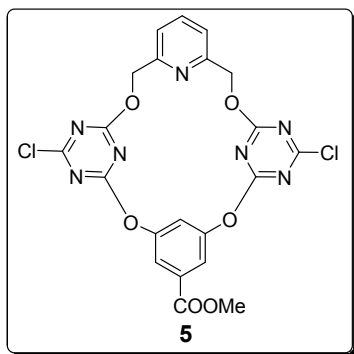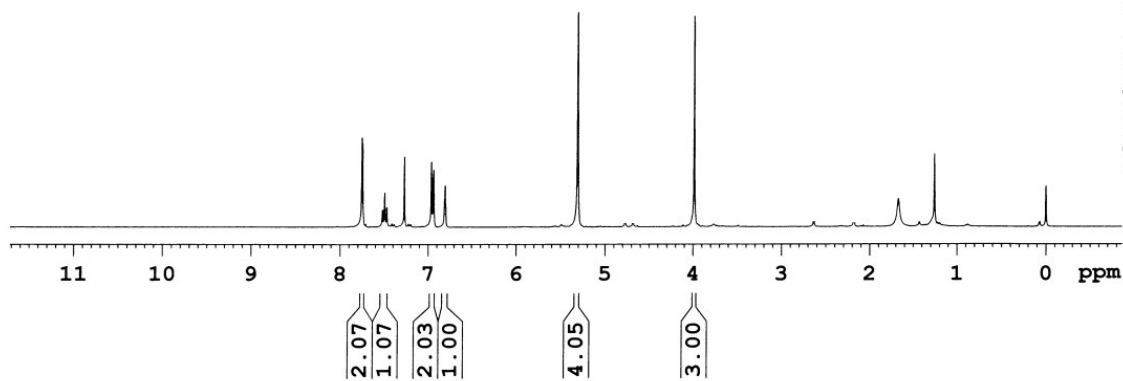

<sup>1</sup>H NMR (300 MHz, CDCl<sub>3</sub>) spectrum of the Oxacalixarene 5

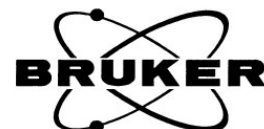

Current Data Parameters  
NAME KR-72  
EX?NO 1  
PROCNO 1

F2 - Acquisition Parameters  
Date\_ 20130810  
Time 0.02  
INSTRUM spect  
PROBHD 5 mm DUL 13C-1  
PULPROG zgpg30  
TD 65536  
SOLVENT CDCl3  
NS 1787  
DS 4  
SWH 17985.611 Hz  
FIDRES 0.274439 Hz  
AQ 1.8219508 sec  
RG 1625.5  
DW 27.800 usec  
DE 6.00 usec  
TE 300.0 K  
D1 2.00000000 sec  
d11 0.03000000 sec  
DELTA 1.89999998 sec  
TDO 1

===== CHANNEL f1 =====  
NUC1 13C  
P1 9.30 usec  
PL1 0.00 dB  
SFO1 75.4752953 MHz

===== CHANNEL f2 =====  
CPDPRG2 waltz16  
NUC2 1H  
PCPD2 80.00 usec  
PL2 0.00 dB  
PL12 15.68 dB  
PL13 16.00 dB  
SFO2 300.1312005 MHz

F2 - Processing parameters  
SI 32768  
SF 75.4677490 MHz  
WDW EM  
SSB 0  
LB 1.00 Hz  
GB 0  
PC 1.40

174.28  
172.08  
171.73  
164.71  
155.05  
151.62  
137.65  
132.54  
121.69  
118.20  
117.51  
77.44  
77.02  
76.59  
70.43  
52.87

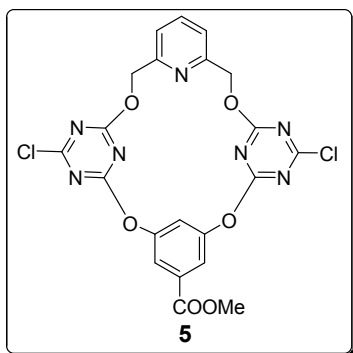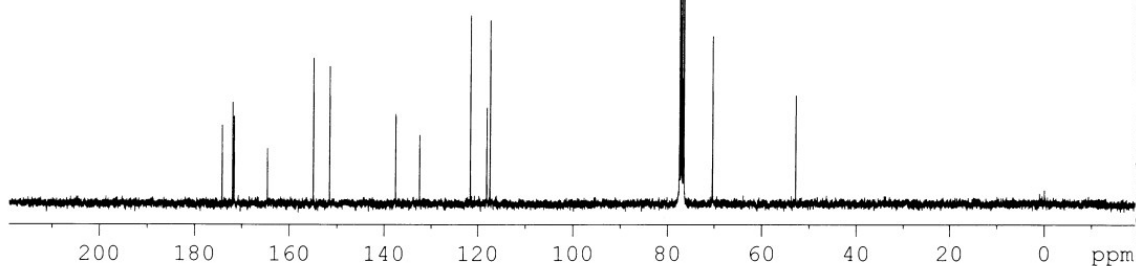

<sup>13</sup>C NMR (75 MHz, CDCl<sub>3</sub>) spectrum of the Oxacalixarene **5**

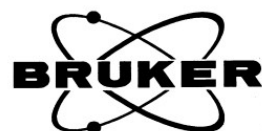

Current Data Parameters  
NAME KRC-234  
EXPNO 1  
PROCNO 1

F2 - Acquisition Parameters  
Date\_ 20150130  
Time 23.26  
INSTRUM spect  
PROBHD 5 mm DUL 13C-1  
PULPROG zg30  
TD 65536  
SOLVENT CDCl3  
NS 16  
DS 2  
SWH 6172.839 Hz  
FIDRES 0.094190 Hz  
AQ 5.3084660 sec  
RG 114  
DW 81.000 usec  
DE 6.00 usec  
TE 300.0 K  
D1 1.00000000 sec  
TD0 1

===== CHANNEL f1 =====  
NUC1 1H  
P1 13.15 usec  
PL1 0.00 dB  
SFO1 300.1318534 MHz

F2 - Processing parameters  
SI 32768  
SF 300.1300224 MHz  
WDW EM  
SSB 0  
LB 0.30 Hz  
GB 0  
PC 1.00

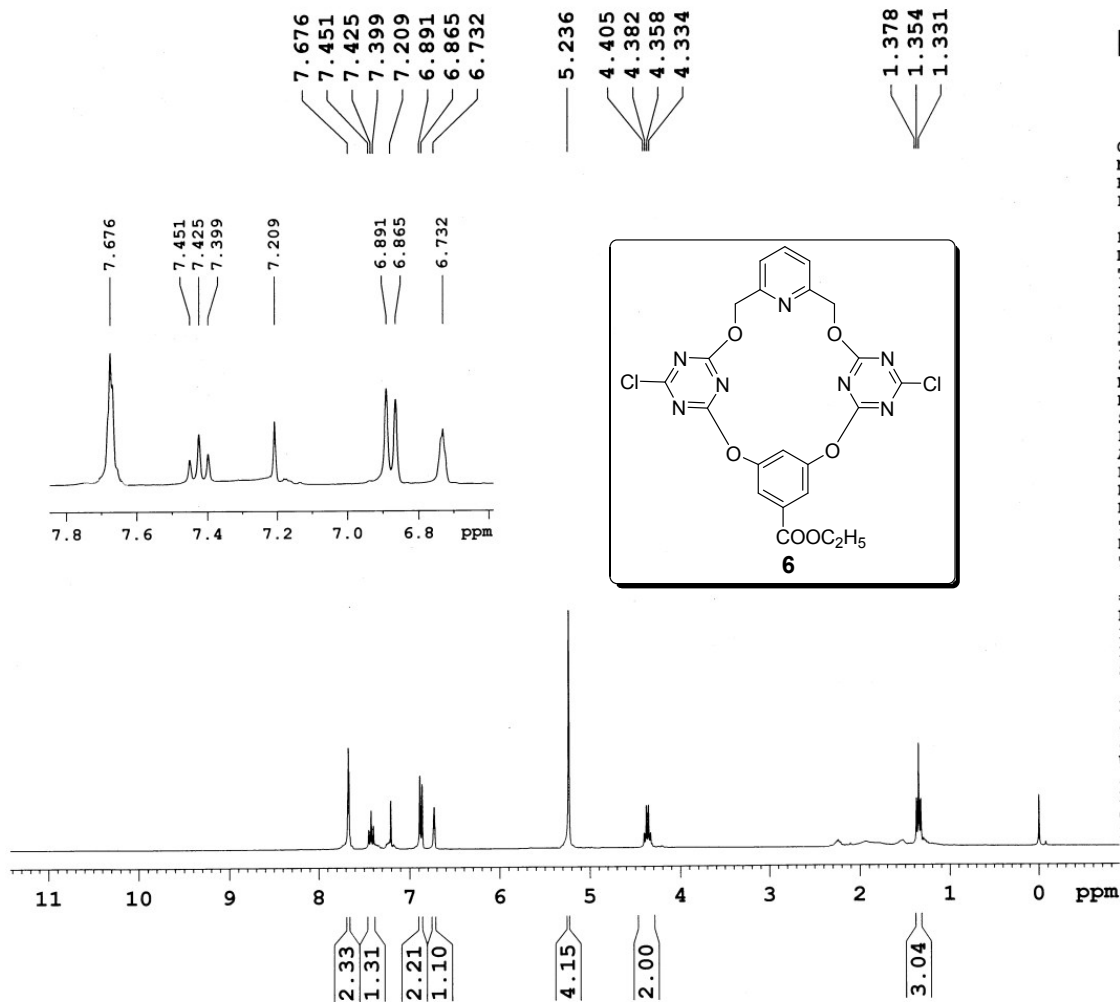

<sup>1</sup>H NMR (300 MHz, CDCl<sub>3</sub>) spectrum of the Oxcalixarene **6**

174.24  
172.08  
171.73  
164.22  
155.03  
151.58  
137.64  
132.93  
121.61  
118.08  
117.51

77.46  
77.04  
76.62  
70.40  
61.98

14.26

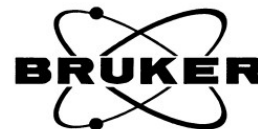

Current Data Parameters  
NAME KRC-234  
EXPNO 2  
PROCNO 1

F2 - Acquisition Parameters  
Date\_ 20150130  
Time\_ 23.35  
INSTRUM spect  
PROBHD 5 mm DUL 13C-1  
PULPROG zgpg30  
TD 65536  
SOLVENT CDCl3  
NS 151  
DS 4  
SWH 17985.611 Hz  
FIDRES 0.274439 Hz  
AQ 1.8219508 sec  
RG 724.1  
DW 27.800 usec  
DE 6.00 usec  
TE 300.0 K  
D1 2.0000000 sec  
d11 0.0300000 sec  
DELTA 1.89999998 sec  
TD0 1

===== CHANNEL f1 =====  
NUC1 13C  
P1 9.30 usec  
PL1 0.00 dB  
SFO1 75.4752953 MHz

===== CHANNEL f2 =====  
CPDPRG2 waltz16  
NUC2 1H  
PCPD2 80.00 usec  
PL2 0.00 dB  
PL12 15.68 dB  
PL13 16.00 dB  
SFO2 300.1312005 MHz

F2 - Processing parameters  
SI 32768  
SF 75.4677490 MHz  
WDW EM  
SSB 0  
LB 1.00 Hz  
GB 0  
PC 1.40

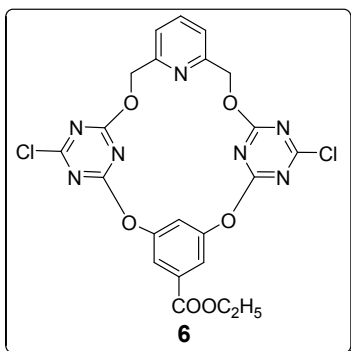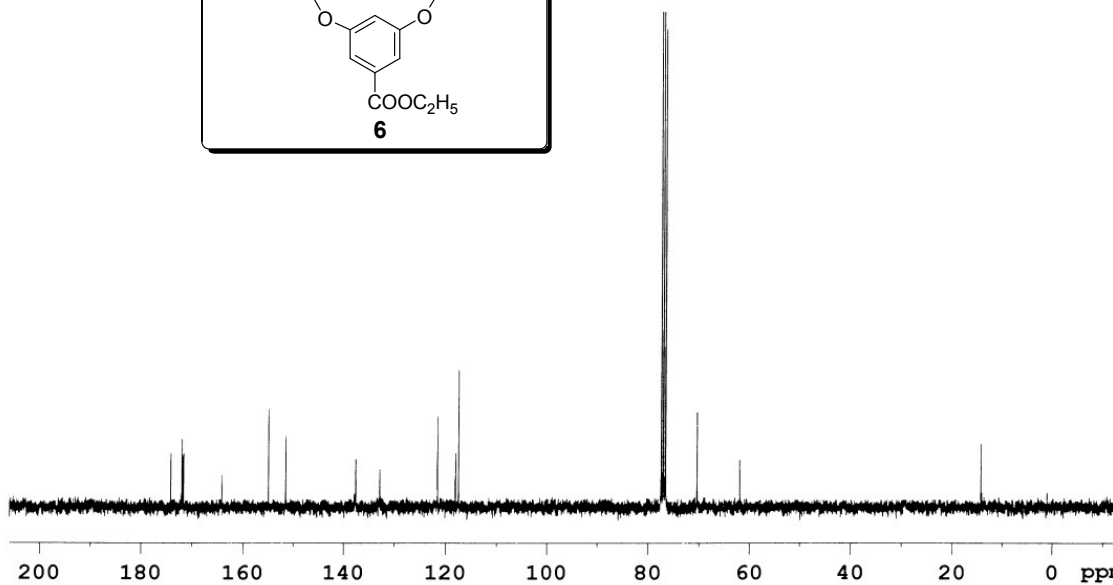

<sup>13</sup>C NMR (75 MHz, CDCl<sub>3</sub>) spectrum of the Oxacalixarene **6**

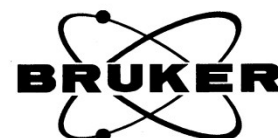

Current Data Parameters  
NAME KR-101  
EXPNO 1  
PROCNO 1

F2 - Acquisition Parameters  
Date\_ 20131027  
Time\_ 21.09  
INSTRUM spect  
PROBHD 5 mm DUL 13C-1  
PULPROG zg30  
TD 65536  
SOLVENT CDC13  
NS 16  
DS 2  
SWH 6172.839 Hz  
FIDRES 0.094190 Hz  
AQ 5.3084660 sec  
RG 143.7  
DW 81.000 usec  
DE 6.00 usec  
TE 300.0 K  
D1 1.00000000 sec  
TDO 1

==== CHANNEL f1 =====  
NUC1 1H  
P1 13.15 usec  
PL1 0.00 dB  
SFO1 300.1318534 MHz

F2 - Processing parameters  
SI 32768  
SF 300.1300084 MHz  
WDW EM  
SSB 0  
LB 0.30 Hz  
GB 0  
PC 1.00

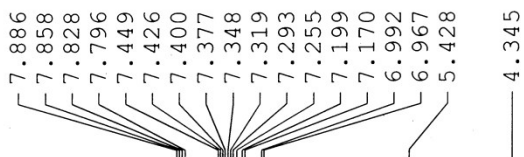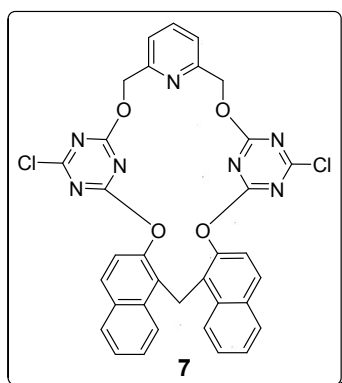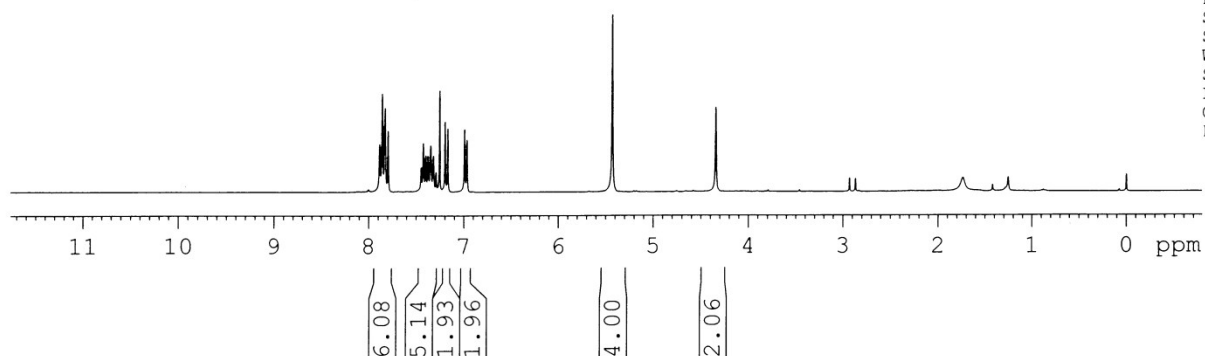

$^1\text{H}$  NMR (300 MHz,  $\text{CDCl}_3$ ) spectrum of the Oxacalixarene 7

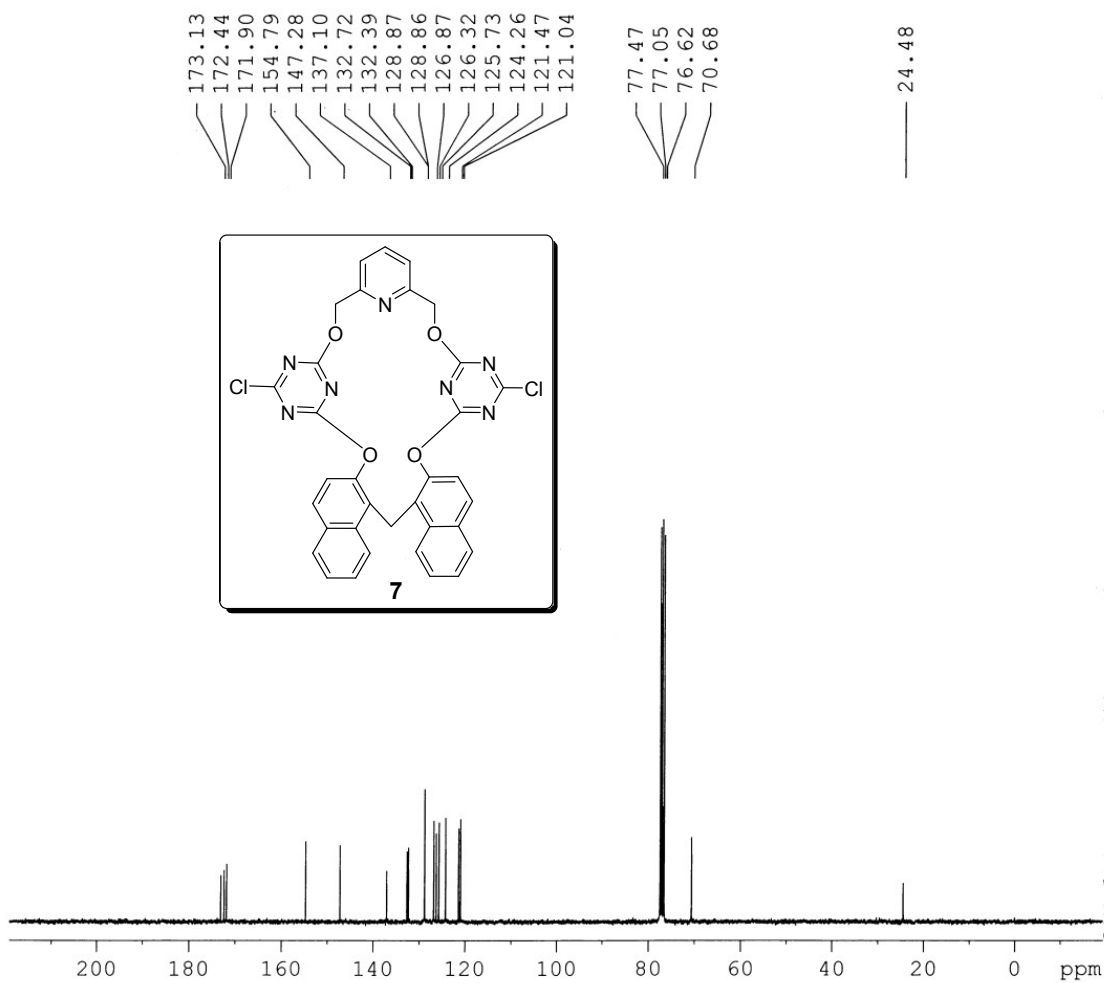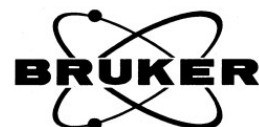

Current Data Parameters  
NAME KR-101  
EXPNO 2  
PROCNO 1

F2 - Acquisition Parameters  
Date\_ 20131027  
Time 21.20  
INSTRUM spect  
PROBHD 5 mm DUL 13C-1  
PULPROG zgpg30  
TD 65536  
SOLVENT CDCl3  
NS 748  
DS 4  
SWH 17985.611 Hz  
FIDRES 0.274439 Hz  
AQ 1.8219508 sec  
RG 812.7  
DW 27.800 usec  
DE 6.00 usec  
TE 300.0 K  
D1 2.00000000 sec  
d11 0.03000000 sec  
DELTA 1.89999998 sec  
TDO 1

===== CHANNEL f1 =====  
NUC1 13C  
P1 9.30 usec  
PL1 0.00 dB  
SFO1 75.4752953 MHz

===== CHANNEL f2 =====  
CPDPRG2 waltz16  
NUC2 1H  
PCPD2 80.00 usec  
PL2 0.00 dB  
PL12 15.68 dB  
PL13 16.00 dB  
SFO2 300.1312005 MHz

F2 - Processing parameters  
SI 32768  
SF 75.4677490 MHz  
WDW EM  
SSB 0  
LB 1.00 Hz  
GB 0  
PC 1.40

$^{13}\text{C}$  NMR (75 MHz,  $\text{CDCl}_3$ ) spectrum of the Oxacalixarene **7**



UNIV. OF MADRAS

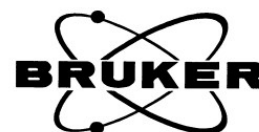

Current Data Parameters  
NAME KRC-101  
EXPNO 1  
PROCNO 1

F2 - Acquisition Parameters  
Date 20140326  
Time 12.56  
INSTRUM spect  
PROBHD 5 mm DUL 13C-1  
PULPROG zg30  
TD 65536  
SOLVENT CDC13  
NS 16  
DS 2  
SWH 6172.839 Hz  
FIDRES 0.094190 Hz  
AQ 5.3084660 sec  
RG 114  
DW 81.000 usec  
DE 6.00 usec  
TE 300.0 K  
D1 1.00000000 sec  
TDO 1

===== CHANNEL f1 =====  
NUC1 1H  
P1 13.15 usec  
PL1 0.00 dB  
SFO1 300.1318534 MHz

F2 - Processing parameters  
SI 32768  
SF 300.1300030 MHz  
WDW EM  
SSB 0  
LB 0.30 Hz  
GB 0  
PC 1.00

7.798  
7.773  
7.747  
7.457  
7.431  
7.301  
7.273  
7.194  
7.166

5.378

1.763

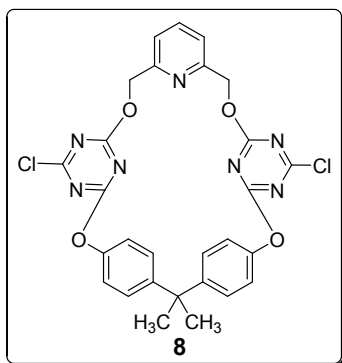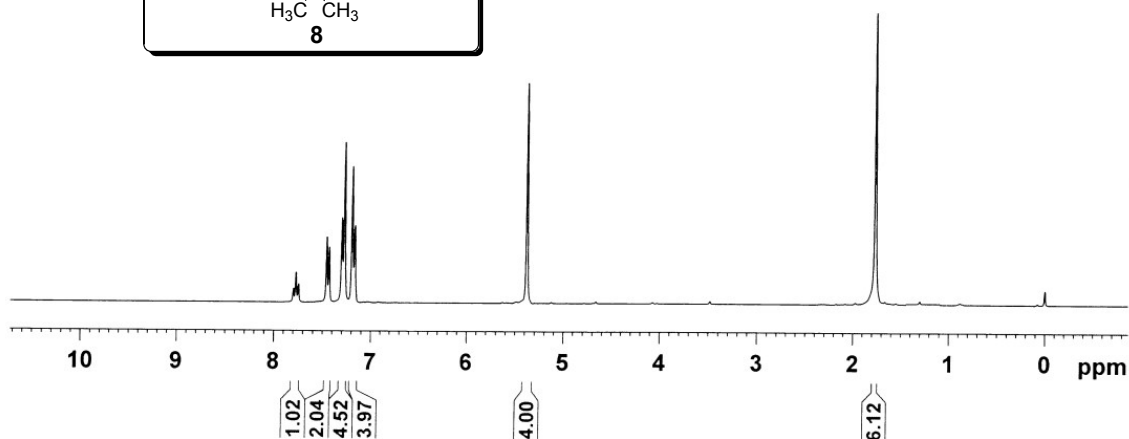

<sup>1</sup>H NMR (300 MHz, CDCl<sub>3</sub>) spectrum of the Oxalixarene **8**

UNIV. OF MADRAS

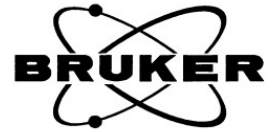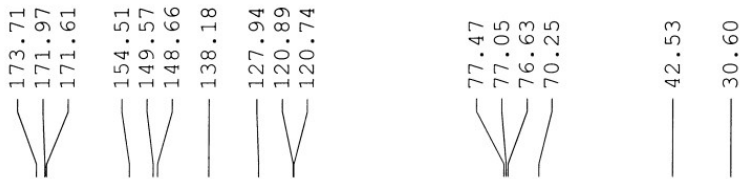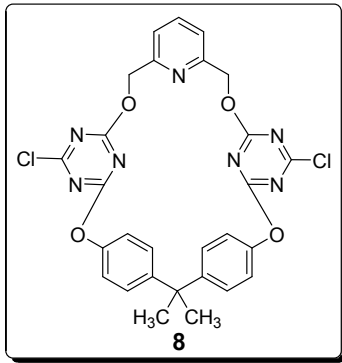

Current Data Parameters  
NAME KRC-101  
EXPNO 2  
PROCNO 1

F2 - Acquisition Parameters  
Date\_ 20140326  
Time 13.03  
INSTRUM spect  
PROBHD 5 mm DUL 13C-1  
PULPROG zgpg30  
TD 65536  
SOLVENT CDCl3  
NS 101  
DS 4  
SWH 17985.611 Hz  
FIDRES 0.274439 Hz  
AQ 1.8219508 sec  
RG 4096  
DW 27.800 usec  
DE 6.00 usec  
TE 300.0 K  
D1 2.00000000 sec  
d11 0.03000000 sec  
DELTA 1.89999998 sec  
TDO 1

===== CHANNEL f1 =====  
NUC1 13C  
P1 9.30 usec  
PL1 0.00 dB  
SFO1 75.4752953 MHz

===== CHANNEL f2 =====  
CPDPRG2 waltz16  
NUC2 1H  
PCPD2 80.00 usec  
PL2 0.00 dB  
PL12 15.68 dB  
PL13 16.00 dB  
SFO2 300.1312005 MHz

F2 - Processing parameters  
SI 32768  
SF 75.4677490 MHz  
WDW EM  
SSB 0  
LB 1.00 Hz  
GB 0  
PC 1.40

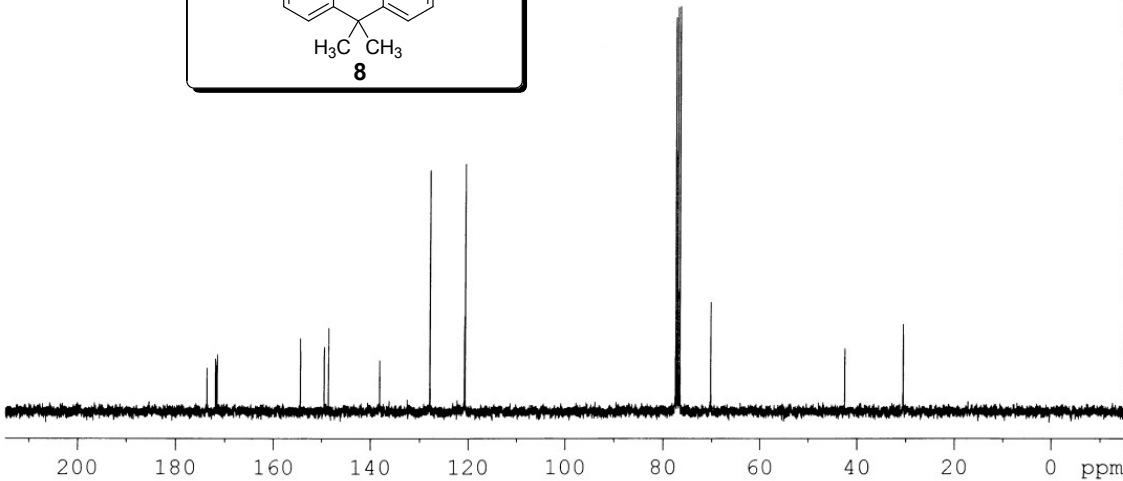

<sup>13</sup>C NMR (75 MHz, CDCl<sub>3</sub>) spectrum of the Oxacalixarene **8**

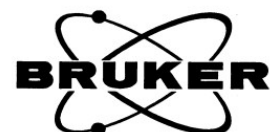

Current Data Parameters  
NAME KRC-61  
EXPNO 1  
PROCNO 1

F2 - Acquisition Parameters  
Date\_ 20141024  
Time\_ 22.22  
INSTRUM spect  
PROBHD 5 mm DUL 13C-1  
PULPROG zg30  
TD 65536  
SOLVENT CDCl3  
NS 16  
DS 2  
SWH 6172.839 Hz  
FIDRES 0.094190 Hz  
AQ 5.3084660 sec  
RG 287.4  
DW 81.000 usec  
DE 6.00 usec  
TE 300.0 K  
D1 1.0000000 sec  
TD0 1

===== CHANNEL f1 =====  
NUC1 1H  
P1 13.15 usec  
PL1 0.00 dB  
SF01 300.1318534 MHz

F2 - Processing parameters  
SI 32768  
SF 300.1300065 MHz  
WDW EM  
SSB 0  
LB 0.30 Hz  
GB 0  
PC 1.00

7.617  
7.589  
7.573  
7.547  
7.266  
7.162  
7.133  
7.054  
7.028  
  
5.131

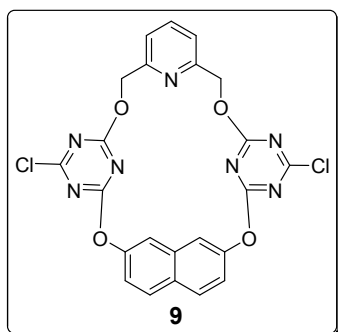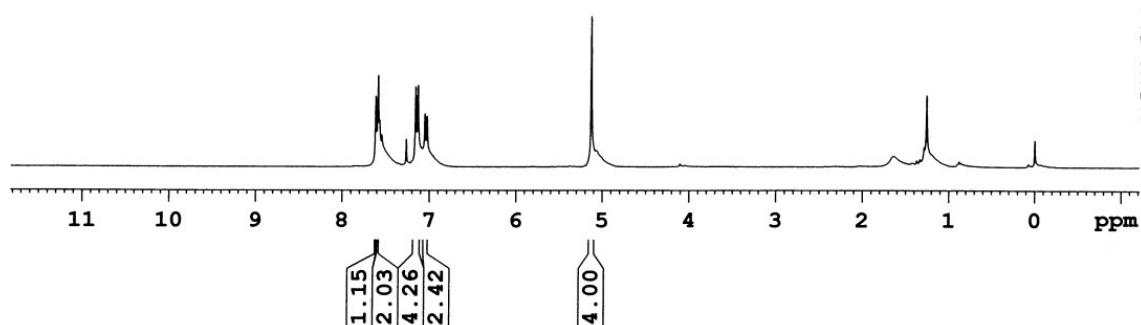

$^1\text{H}$  NMR (300 MHz,  $\text{CDCl}_3$ ) spectrum of the Oxacalixarene **9**

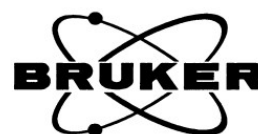

Current Data Parameters  
NAME KRC-61  
EXPNO 3  
PROCNO 1

F2 - Acquisition Parameters  
Date\_ 20141025  
Time\_ 5.07  
INSTRUM spect  
PROBHD 5 mm DUL 13C-1  
PULPROG zgpg30  
TD 65536  
SOLVENT CDCl3  
NS 4721  
DS 4  
SWH 17985.611 Hz  
FIDRES 0.274439 Hz  
AQ 1.8219508 sec  
RG 3649.1  
DW 27.800 usec  
DE 6.00 usec  
TE 300.0 K  
D1 2.00000000 sec  
d11 0.03000000 sec  
DELTA 1.89999998 sec  
TD0 1

===== CHANNEL f1 =====  
NUC1 13C  
P1 9.30 usec  
PL1 0.00 dB  
SFO1 75.4752953 MHz

===== CHANNEL f2 =====  
CPDPRG2 waltz16  
NUC2 1H  
PCPD2 80.00 usec  
PL2 0.00 dB  
PL12 15.68 dB  
PL13 16.00 dB  
SFO2 300.1312005 MHz

F2 - Processing parameters  
SI 32768  
SF 75.4677490 MHz  
WDW EM  
SSB 0  
LB 1.00 Hz  
GB 0  
PC 1.40

174.11  
173.67  
171.95  
154.18  
151.73  
138.24  
137.45  
127.86  
122.61  
118.58

77.46  
77.03  
76.61  
70.70

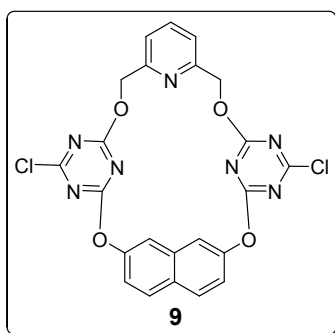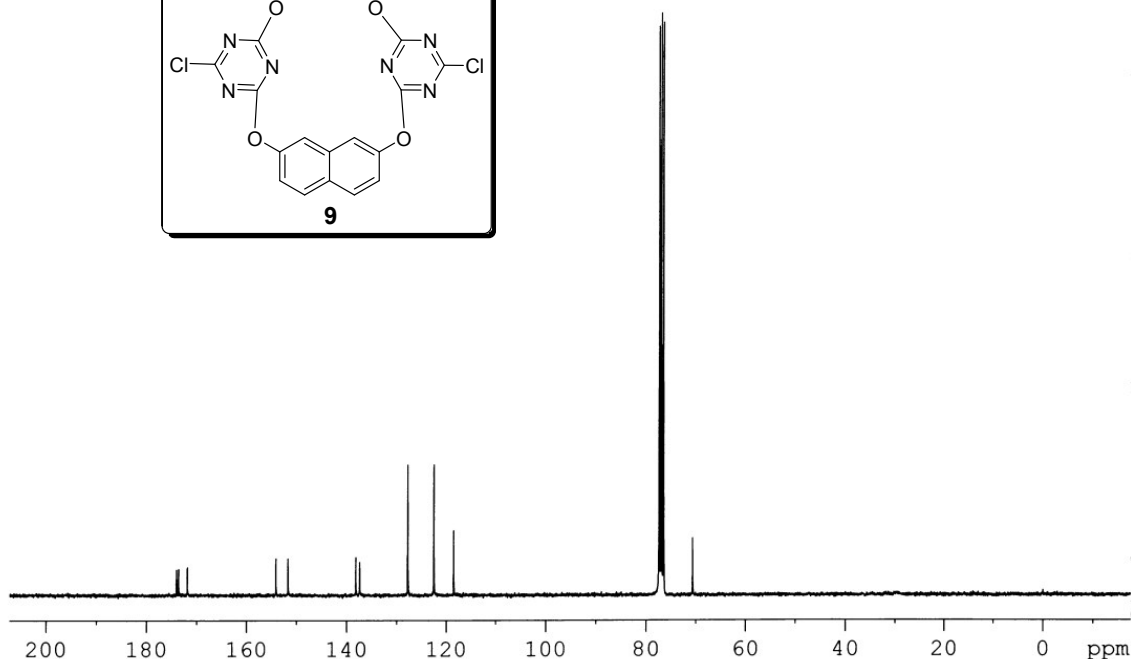

$^{13}\text{C}$  NMR (75 MHz,  $\text{CDCl}_3$ ) spectrum of the Oxacalixarene **9**

### Absorption spectrum of Oxacalixarene 2-9

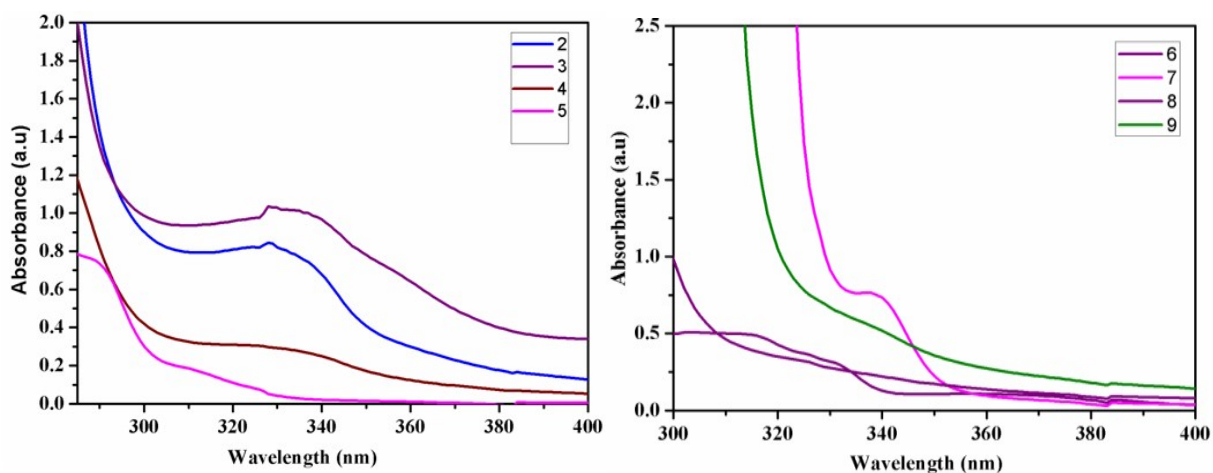

UV- vis absorption spectra of oxacalixarene **2-5** and **6-9** ( $1 \times 10^{-3}$  mol L<sup>-1</sup>) in DMF

### Emmision studies

The emission spectrum of oxacalixarene **9** exhibited multiple emission bands due to presence of bisphenol A presented in the system.

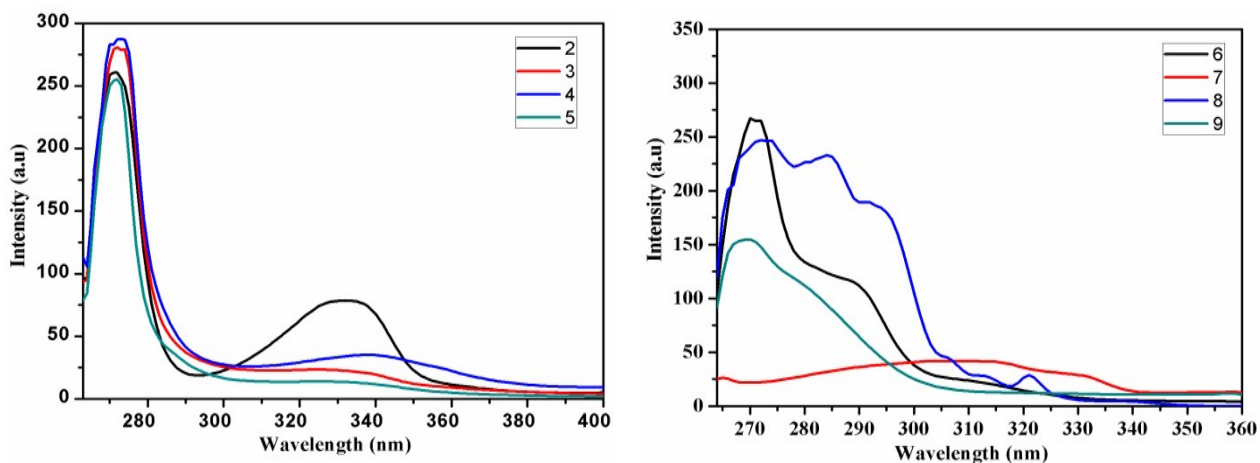

The emission spectra were recorded at corresponding absorption maximum for all the oxacalixarenes. The excitation wavelength range for all the oxacalixarenes was 325-350 nm.

## S-4

### DNA binding studies of oxacalixarene 5

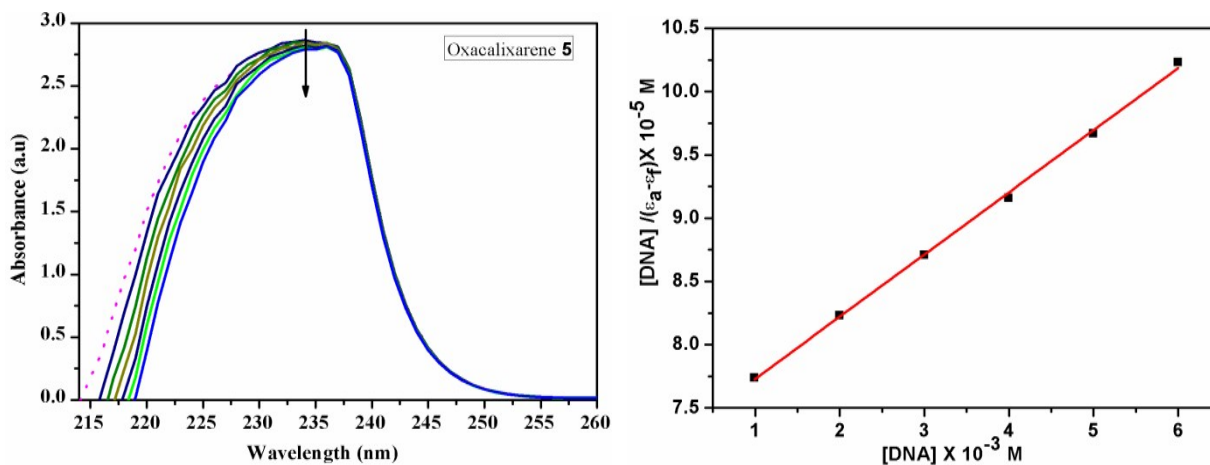

Absorption spectra of oxacalixarene 5 in the absence (dotted line) and presence of (thick line) increasing amounts of CT-DNA (0-250  $\mu\text{M}$ ) at 25  $^{\circ}\text{C}$  in 50 mM Tris-HCl (pH = 7.2).

## S-5

### Antibacterial studies of oxacalixarenes 2-9

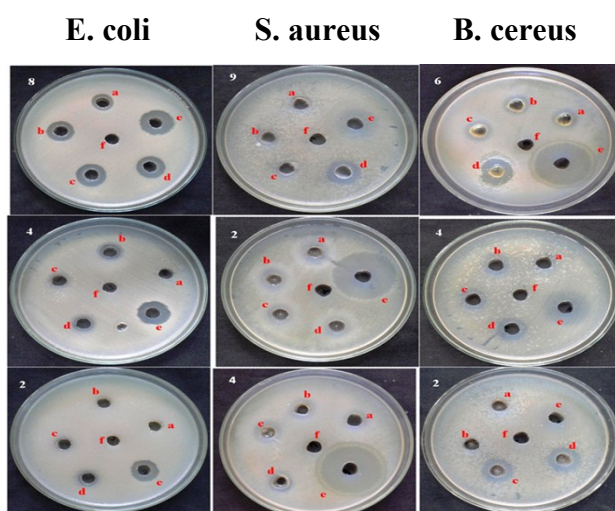

Control - 9% DMSO (Dimethyl sulfoxide)

Standard - Ampicillin

Antibacterial activity of oxacalixarenes against *E. coli*, *S. aureus* and *B. cereus*.

## Docking studies of oxacalixarenes **2** and **4**

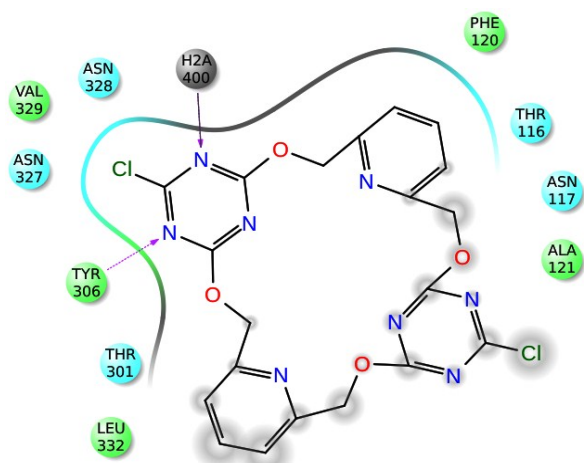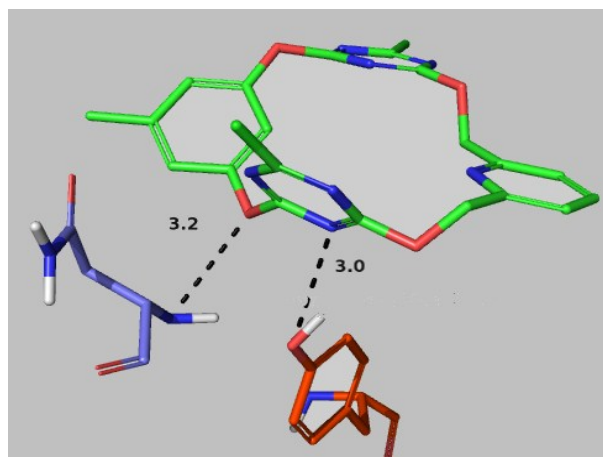

Binding of oxacalixarenes **2** and **4** with the Covalent Acyl enzyme (PDB ID: 1PW8).
